# Supplementary material
Source: PubMed Central journal article supplement (PMC5359478)
Supplement: AEM.03397-16_zam999117726s1.pdf [file AEM.03397-16_zam999117726s1.pdf]

## Supplementary Information

**The regulator of type IV pili synthesis, PilR, from *Lysobacter* controls antifungal antibiotic production via a c-di-GMP pathway**

**Yuan Chen<sup>a</sup>, Jing Xia<sup>a</sup>, Zhenhe Su<sup>a</sup>, Gaoge Xu<sup>a</sup>, Mark Gomelsky<sup>c</sup>, Guoliang Qian<sup>a\*</sup>, and Fengquan Liu<sup>a, b\*</sup>**

<sup>a</sup>College of Plant Protection, Nanjing Agricultural University, Nanjing 210095, P.R. China

<sup>b</sup>Institute of Plant Protection, Jiangsu Academy of Agricultural Sciences, Nanjing 210014, P.R. China

<sup>c</sup>Department of Molecular Biology, University of Wyoming, Laramie, Wyoming 82071

**Running Head:** Regulation of antibiotic production in *Lysobacter* via PilR

\*To whom correspondence should be addressed. Tel: +86-25-84396109. Fax: +86-25-84396109.

E-mail: [glqian@njau.edu.cn](mailto:glqian@njau.edu.cn) (G. Qian) and [fqliu20011@sina.com](mailto:fqliu20011@sina.com) (F. Liu).

**Table S1 Identified two-component systems in *Lysobacter enzymogenes***

| <i>L. enzymogenes</i> strain OH11 |            |       |                     | <i>L. enzymogenes</i> strain C3 <sup>b</sup> |                  |         |          |                                                                               |
|-----------------------------------|------------|-------|---------------------|----------------------------------------------|------------------|---------|----------|-------------------------------------------------------------------------------|
| TCS locus <sup>a</sup>            | Protein ID | Class | Family <sup>c</sup> | Protein ID                                   | Genebank ID (GI) | E-value | Ident(%) | Protein definition                                                            |
| *1                                | Le0041     | RR    | NarL                | ALN55927.1                                   | 951301690        | 2e-144  | 99       | Two-component system response regulator, LuxR family                          |
| 2                                 | Le0371     | RR    | NarL                | ALN59922.1                                   | 951305685        | 6e-88   | 61       | Transcriptional regulator, LuxR family                                        |
|                                   | Le0372     | HK    | Classic             | ALN59923.1                                   | 951305686        | 2e-72   | 42       | Sensor histidine kinase                                                       |
| *3                                | Le0440     | HK    | Hybrid              | ALN55523.1                                   | 951301286        | 0.0     | 99       | Sensory box histidine kinase                                                  |
| *4                                | Le0445     | RR    | NarL                | ALN55518.1                                   | 951301281        | 7e-160  | 100      | Transcriptional regulator, LuxR family                                        |
| *5                                | Le0537     | RR    | NarL                | ALN55363.1                                   | 951301126        | 2e-141  | 89       | LuxR family regulatory protein                                                |
| 6                                 | Le0597     | HK    | Classic             | ALN57914.1                                   | 951303677        | 5e-28   | 30       | Histidine kinase                                                              |
|                                   | Le0598     | RR    | OmpR                | ALN57913.1                                   | 951303676        | 2e-48   | 38       | Transcriptional regulatory protein, C terminal-DNA-binding response regulator |
| *7                                | Le0674     | HK    | Hybrid              | ALN60709.1                                   | 951306472        | 0.0     | 99       | Sensor histidine kinase                                                       |
| 8                                 | Le0735     | HK    | Classic             | ALN60651.1                                   | 951306414        | 0.0     | 98       | Sensory box histidine kinase                                                  |
|                                   | Le0736     | RR    | CheY                | ALN60650.1                                   | 951306413        | 4e-107  | 100      | Response regulator receiver protein                                           |
| 9                                 | Le0752     | RR    | OmpR                | ALN60588.1                                   | 951306351        | 2e-161  | 99       | Response regulator receiver domain                                            |
|                                   | Le0754     | HK    | Classic             | ALN60589.1                                   | 951306352        | 0.0     | 94       | Sensor histidine kinase                                                       |
| 10                                | Le0759     | HK    | Classic             | ALN60608.1                                   | 951306371        | 0.0     | 94       | Two-component system sensor protein                                           |
|                                   | Le0760     | RR    | NarL                | ALN60609.1                                   | 951306372        | 1e-148  | 99       | Transcriptional regulator, LuxR family                                        |
| 11                                | Le0871     | HK    | Unorthodox          | ALN60506.1                                   | 951306269        | 0.0     | 96       | Sensory box histidine kinase                                                  |
|                                   | Le0872     | RR    | VieA                | ALN60505.1                                   | 951306268        | 0.0     | 96       | Response regulator protein                                                    |
| *12                               | Le0906     | RR    | PrrA                | ALN60469.1                                   | 951306232        | 4e-141  | 99       | Photosynthetic apparatus regulatory protein RegA                              |
| 13                                | Le0916     | RR    | NarL                | ALN60459.1                                   | 951306222        | 3e-146  | 98       | Response regulator receiver domain                                            |
|                                   | Le0918     | HK    | Classic             | ALN60456.1                                   | 951306219        | 0.0     | 95       | His Kinase A (phosphoacceptor) domain                                         |
| 14                                | Le0978     | HK    | Classic             | ALN60390.1                                   | 951306153        | 0.0     | 99       | Nitrogen regulation protein NtrB                                              |

|     |                  |    |         |            |           |        |     |                                                                                 |
|-----|------------------|----|---------|------------|-----------|--------|-----|---------------------------------------------------------------------------------|
|     | Le0979           | RR | NtrC    | ALN60389.1 | 951306152 | 0.0    | 99  | Nitrogen regulation protein NR(I)                                               |
| *15 | Le1110           | RR | FrzZ    | ALN60254.1 | 951306017 | 0.0    | 100 | Response regulator protein                                                      |
| 16  | Le1119           | HK | Classic | ALN60244.1 | 951306007 | 0.0    | 98  | Sensor histidine kinase                                                         |
|     | Le1120           | RR | OmpR    | ALN60243.1 | 951306006 | 7e-165 | 99  | Response regulator receiver domain protein                                      |
| 17  | Le1128           | HK | Classic | ALN60231.1 | 951305994 | 0.0    | 98  | Sensor kinase RpeA                                                              |
|     | Le1130           | RR | OmpR    | ALN60230.1 | 951305993 | 9e-171 | 100 | DNA-binding response regulator                                                  |
| 18  | Le1234           | RR | OmpR    | ALN60121.1 | 951305884 | 2e-163 | 99  | Transcriptional regulatory protein, C terminal - DNA-binding response regulator |
|     | Le1235           | HK | Classic | ALN60120.1 | 951305883 | 0.0    | 98  | Sensor histidine kinase                                                         |
| 19  | Le1262           | HK | Classic | ALN60094.1 | 951305857 | 0.0    | 96  | Sensor histidine kinase                                                         |
|     | Le1263           | RR | OmpR    | ALN60093.1 | 951305856 | 2e-156 | 97  | Transcriptional regulatory protein, C terminal - transcriptional regulator      |
| 20  | Le1422           | HK | Classic | ALN59923.1 | 951305686 | 0.0    | 98  | Sensor histidine kinase                                                         |
|     | Le1423           | RR | NarL    | ALN59922.1 | 951305685 | 2e-157 | 100 | Transcriptional regulator, LuxR family                                          |
| 21  | Le1445           | HK | Classic | ALN59895.1 | 951305658 | 0.0    | 98  | Two-component system sensor protein                                             |
|     | Le1446           | RR | LytTR   | ALN59894.1 | 951305657 | 2e-173 | 99  | Alginate biosynthesis regulatory protein                                        |
| 22  | Le1610           | RR | OmpR    | ALN59664.1 | 951305427 | 5e-157 | 99  | DNA-binding response regulator                                                  |
|     | Le1611           | HK | Classic | ALN59663.1 | 951305426 | 0.0    | 98  | Sensor histidine kinase                                                         |
| 23  | Le1647           | RR | OmpR    | ALN59623.1 | 951305386 | 2e-163 | 100 | DNA-binding response regulator                                                  |
|     | Le1648           | HK | Classic | ALN59622.1 | 951305385 | 0.0    | 98  | Sensor histidine kinase                                                         |
| 24  | Le1804<br>(PilR) | RR | NtrC    | ALN59455.1 | 951305218 | 0.0    | 99  | Type IV pilus expression regulatory protein                                     |
|     | Le1805<br>(PilS) | HK | Classic | ALN59454.1 | 951305217 | 0.0    | 99  | Type IV pilus sensor protein                                                    |
| *25 | Le1909           | RR | CheY    | ALN59304.1 | 951305067 | 2e-88  | 100 | Type IV pilus assembly protein                                                  |

|     |        |    |            |            |           |        |     |                                                                                 |
|-----|--------|----|------------|------------|-----------|--------|-----|---------------------------------------------------------------------------------|
| *26 | Le1910 | RR | CheY       | ALN59303.1 | 951305066 | 3e-67  | 98  | Type IV pilus assembly protein                                                  |
| *27 | Le1914 | HK | CheA       | ALN59300.1 | 951305063 | 0.0    | 99  | Hpt domain protein                                                              |
| 28  | Le1919 | HK | Classic    | ALN59294.1 | 951305057 | 0.0    | 81  | Signal transduction histidine kinase                                            |
|     | Le1921 | RR | CheY       | ALN59293.1 | 951305056 | 6e-89  | 99  | Response regulator receiver domain                                              |
| 29  | Le1936 | RR | OmpR       | ALN59277.1 | 951305040 | 5e-168 | 100 | Transcriptional regulatory protein, C terminal DNA-binding response regulator v |
|     | Le1937 | HK | Classic    | ALN59276.1 | 951305039 | 0.0    | 99  | Histidine kinase                                                                |
| 30  | Le2134 | RR | NarL       | ALN59088.1 | 951304851 | 4e-165 | 99  | Transcriptional regulator, LuxR/UhpA family                                     |
|     | Le2135 | HK | Hybrid     | ALN59087.1 | 951304850 | 0.0    | 97  | Sensory box histidine kinase                                                    |
| 31  | Le2296 | RR | NarL       | ALN58894.1 | 951304657 | 3e-155 | 99  | Two component transcriptional regulator, LuxR family                            |
|     | Le2297 | HK | Classic    | ALN58893.1 | 951304656 | 1e-163 | 97  | Histidine kinase                                                                |
| 32  | Le2332 | HK | Classic    | ALN58862.1 | 951304625 | 0.0    | 100 | Histidine kinase                                                                |
|     | Le2333 | RR | NarL       | ALN58861.1 | 951304624 | 5e-145 | 100 | Transcriptional regulator, LuxR family                                          |
| 33  | Le2666 | RR | OmpR       | ALN58543.1 | 951304306 | 8e-175 | 99  | KDP operon transcriptional regulatory protein KdpE                              |
|     | Le2667 | HK | Classic    | ALN58542.1 | 951304305 | 0.0    | 99  | Two-component system sensor kinase KdpD                                         |
| 34  | Le2947 | HK | Classic    | ALN57550.1 | 951303313 | 0.0    | 99  | Histidine kinase                                                                |
|     | Le2949 | RR | PrrA       | ALN57551.1 | 951303314 | 6e-128 | 97  | DNA-binding response regulator                                                  |
| *35 | Le2973 | HK | Classic    | ALN57572.1 | 951303335 | 0.0    | 98  | Sensory box histidine kinase                                                    |
| 36  | Le3034 | RR | RpfG       | ALN57630.1 | 951303393 | 0.0    | 100 | Response regulator                                                              |
|     | Le3035 | HK | Unorthodox | ALN57631.1 | 951303394 | 0.0    | 99  | Sensory/regulatory protein RpfC                                                 |
| 37  | Le3126 | RR | PrrA       | ALN57720.1 | 951303483 | 6e-145 | 99  | Photosynthetic apparatus regulatory protein RegA                                |
|     | Le3127 | HK | Classic    | ALN57721.1 | 951303484 | 0.0    | 99  | Histidine kinase                                                                |
| *38 | Le3199 | RR | PleD       | ALN57796.1 | 951303559 | 0.0    | 99  | WspR                                                                            |
| 39  | Le3200 | RR | CheB       | ALN57797.1 | 951303560 | 0.0    | 99  | Protein-glutamate methyltransferase CheB                                        |
|     | Le3201 | HK | CheA       | ALN57798.1 | 951303561 | 0.0    | 99  | Histidine kinase                                                                |

|     |        |    |           |            |           |        |     |                                                                                 |
|-----|--------|----|-----------|------------|-----------|--------|-----|---------------------------------------------------------------------------------|
| 40  | Le3342 | HK | Hybrid    | ALN57980.1 | 951303743 | 0.0    | 90  | Sensory box histidine kinase                                                    |
|     | Le3343 | RR | NarL      | ALN57981.1 | 951303744 | 1e-137 | 93  | DNA-binding response regulator, LuxR family                                     |
| *41 | Le3450 | RR | CheY      | ALN58078.1 | 951303841 | 2e-91  | 99  | Type IV pilus assembly protein                                                  |
| 42  | Le3590 | RR | NarL      | ALN58210.1 | 951303973 | 3e-156 | 99  | Two component transcriptional regulator, LuxR family                            |
|     | Le3591 | HK | Hybrid    | ALN58212.1 | 951303975 | 0.0    | 98  | Sensory box histidine kinase                                                    |
| *43 | Le3679 | RR | NarL      | ALN58299.1 | 951304062 | 5e-152 | 100 | Two-component system response regulator, LuxR family                            |
| 44  | Le3696 | RR | OmpR      | ALN58320.1 | 951304083 | 2e-179 | 100 | Transcriptional regulatory protein                                              |
|     | Le3697 | HK | Classic   | ALN58321.1 | 951304084 | 0.0    | 98  | Signal transduction histidine kinase                                            |
| *45 | Le3816 | RR | OmpR      | ALN58438.1 | 951304201 | 0.0    | 99  | Two component transcriptional regulator, winged helix family                    |
| *46 | Le4011 | RR | PleD_VieA | ALN57164.1 | 951302927 | 0.0    | 99  | Sensory box-containing diguanylate cyclase/cyclic diguanylate phosphodiesterase |
| 47  | Le4033 | HK | Classic   | ALN57142.1 | 951302905 | 0.0    | 98  | Sensor protein RstB                                                             |
|     | Le4034 | RR | OmpR      | ALN57141.1 | 951302904 | 3e-165 | 99  | DNA-binding response regulator                                                  |
| 48  | Le4041 | HK | Classic   | ALN57135.1 | 951302898 | 0.0    | 97  | Putative heavy metal histidine sensor kinase                                    |
|     | Le4042 | RR | OmpR      | ALN57134.1 | 951302897 | 1e-171 | 99  | Two component heavy metal response transcriptional regulator                    |
| *49 | Le4104 | HK | Hybrid    | ALN57068.1 | 951302831 | 2e-163 | 98  | Sensor histidine kinase                                                         |
| 50  | Le4189 | RR | OmpR      | ALN57006.1 | 951302769 | 2e-172 | 99  | Phosphate regulon transcriptional regulatory protein PhoB                       |
|     | Le4190 | HK | Classic   | ALN57005.1 | 951302768 | 0.0    | 99  | Phosphate regulon sensor kinase PhoR                                            |
| 51  | Le4212 | HK | Classic   | ALN56986.1 | 951302749 | 0.0    | 99  | Sensor histidine kinase                                                         |
|     | Le4215 | RR | OmpR      | ALN56985.1 | 951302748 | 2e-161 | 98  | DNA-binding response regulator                                                  |
| 52  | Le4259 | HK | Classic   | ALN56935.1 | 951302698 | 0.0    | 99  | Histidine kinase                                                                |
|     | Le4260 | RR | NarL      | ALN56936.1 | 951302699 | 7e-151 | 99  | Two-component system regulatory protein                                         |
| 53  | Le4302 | HK | Classic   | ALN56897.1 | 951302660 | 0.0    | 95  | Histidine kinase                                                                |
|     | Le4303 | RR | LytTR     | ALN56896.1 | 951302659 | 0.0    | 96  | Response regulator receiver/LytTR DNA-binding domain protein                    |

|     |        |    |         |            |           |        |     |                                                                       |
|-----|--------|----|---------|------------|-----------|--------|-----|-----------------------------------------------------------------------|
| *54 | Le4678 | HK | Hybrid  | ALN56502.1 | 951302265 | 0.0    | 98  | Histidine kinase/ response regulator hybrid protein                   |
| *55 | Le4679 | HK | Hybrid  | ALN56501.1 | 951302264 | 0.0    | 99  | Histidine kinase-, DNA gyrase B-, and HSP90-like atpase               |
| 56  | Le4778 | RR | LytTR   | ALN59894.1 | 951305657 | 4e-39  | 39  | Alginate biosynthesis regulatory protein                              |
|     | Le4779 | HK | Classic | ALN59895.1 | 951305658 | 4e-26  | 40  | Two-component system sensor protein                                   |
| 57  | Le4788 | HK | Classic | ALN56382.1 | 951302145 | 0.0    | 99  | Sensor histidine kinase                                               |
|     | Le4789 | RR | OmpR    | ALN56381.1 | 951302144 | 5e-168 | 100 | Transcriptional regulatory protein, C terminal                        |
| 58  | Le4844 | HK | Classic | ALN59682.1 | 951305445 | 0.0    | 99  | Sensor histidine kinase                                               |
|     | Le4845 | RR | OmpR    | ALN59683.1 | 951305446 | 9e-170 | 100 | DNA-binding response regulator                                        |
| 59  | Le5176 | RR | NtrC    | ALN56052.1 | 951301815 | 0.0    | 99  | C4-dicarboxylate transport transcriptional regulatory protein<br>DctD |
|     | Le5177 | HK | Classic | ALN56051.1 | 951301814 | 0.0    | 99  | Histidine kinase                                                      |
| 60  | Le5230 | RR | OmpR    | ALN55989.1 | 951301752 | 6e-165 | 97  | DNA-binding response regulator                                        |
|     | Le5231 | HK | Hybrid  | ALN55990.1 | 951301753 | 0.0    | 97  | Sensory box histidine kinase                                          |

<sup>a</sup>The asterisks indicate that these two-component systems are orphans in *Lysobacter enzymogenes*.

<sup>b</sup>Data for the genome information of *L. enzymogenes* strain C3 was downloaded from NCBI with an accession number of CP013140.

<sup>c</sup>The domain architecture of each family was presented in Figure 1.

15

16

Table S2 Representative HPLC results for HSAF analysis of RR mutants

| Strains        | HPLC <sup>a</sup>                                                                  | Peak area | OD <sub>600</sub> | Area/OD <sub>600</sub> | Strains        | HPLC                                                                                 | Peak area | OD <sub>600</sub> | Area/OD <sub>600</sub> |
|----------------|------------------------------------------------------------------------------------|-----------|-------------------|------------------------|----------------|--------------------------------------------------------------------------------------|-----------|-------------------|------------------------|
| OH11           | 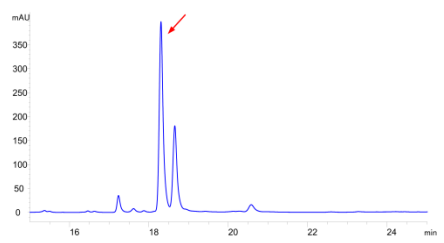  | 2805.2    | 1.26              | 2226.3                 | <i>ΔrpfGLE</i> |   | 18.8      | 1.428             | 13.2                   |
| <i>ΔLe0041</i> |   | 3335.8    | 1.132             | 2946.8                 | <i>ΔLe0371</i> |   | 3611.5    | 1.262             | 2861.7                 |
| <i>ΔLe0445</i> |  | 3010.4    | 1.07              | 2813.5                 | <i>ΔLe0537</i> |  | 1992.2    | 1.26              | 1581.1                 |

|                 |                                                                                     |        |       |        |                 |                                                                                       |        |       |        |
|-----------------|-------------------------------------------------------------------------------------|--------|-------|--------|-----------------|---------------------------------------------------------------------------------------|--------|-------|--------|
| $\Delta Le0598$ | 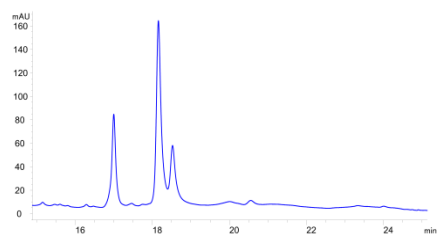   | 1432.2 | 1.214 | 1179.7 | $\Delta Le0760$ |    | 3308.3 | 1.072 | 3086.1 |
| $\Delta Le0872$ |    | 1750.2 | 1.199 | 1459.7 | $\Delta Le0906$ |    | 2192.2 | 1.201 | 1825.3 |
| $\Delta Le0916$ |   | 2799.5 | 1.191 | 2350.5 | $\Delta Le0979$ |   | 2958.3 | 1.152 | 2568.0 |
| $\Delta Le1110$ |  | 2869.4 | 1.135 | 2528.1 | $\Delta Le1120$ |  | 2799.2 | 1.415 | 1978.2 |



|                 |                                                                                     |        |       |        |                 |                                                                                       |        |       |        |
|-----------------|-------------------------------------------------------------------------------------|--------|-------|--------|-----------------|---------------------------------------------------------------------------------------|--------|-------|--------|
| $\Delta Le1130$ | 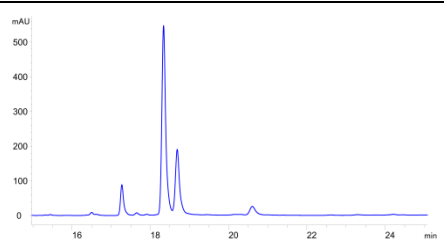   | 3815.2 | 1.7   | 2244.2 | $\Delta Le1234$ |    | 2317.3 | 1.249 | 1855.3 |
| $\Delta Le1263$ |    | 2498.5 | 1.24  | 2014.9 | $\Delta Le1423$ |    | 2747   | 1.139 | 2411.8 |
| $\Delta Le1446$ |   | 2159.8 | 1.223 | 1766.0 | $\Delta Le1610$ |   | 2873.6 | 1.444 | 1990.0 |
| $\Delta Le1647$ |  | 2842.7 | 1.285 | 2212.2 | $\Delta pilR$   |  | 216.4  | 1.097 | 197.3  |

|                 |                                                                                     |        |       |        |                 |                                                                                       |        |       |        |
|-----------------|-------------------------------------------------------------------------------------|--------|-------|--------|-----------------|---------------------------------------------------------------------------------------|--------|-------|--------|
| $\Delta Le1910$ | 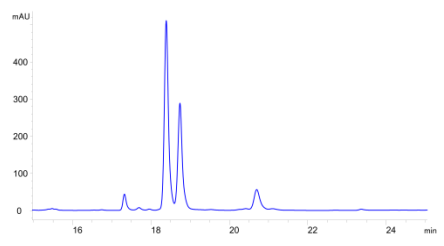   | 3850.9 | 1.283 | 3001.5 | $\Delta Le1921$ |    | 2794.1 | 1.3   | 2149.3 |
| $\Delta Le1936$ |    | 2222   | 0.876 | 2536.5 | $\Delta Le2134$ |    | 2206   | 1.305 | 1690.4 |
| $\Delta Le2333$ |    | 2928.2 | 1.237 | 2367.2 | $\Delta Le2666$ |    | 2636.1 | 1.213 | 2173.2 |
| $\Delta Le2949$ |  | 3078.4 | 1.21  | 2544.1 | $\Delta Le3126$ |  | 4015   | 1.063 | 3777.0 |

|                 |                                                                                     |        |       |        |                 |                                                                                       |        |       |        |
|-----------------|-------------------------------------------------------------------------------------|--------|-------|--------|-----------------|---------------------------------------------------------------------------------------|--------|-------|--------|
| $\Delta Le3199$ | 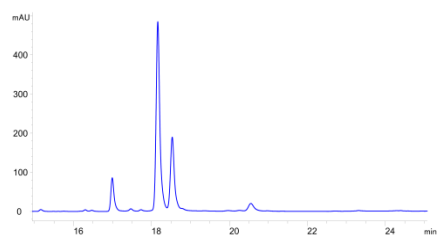   | 3295.2 | 1.344 | 2451.8 | $\Delta Le3200$ |    | 529.9  | 1.422 | 372.6  |
| $\Delta Le3343$ |    | 2741.2 | 1.119 | 2449.7 | $\Delta Le3450$ |    | 3723.3 | 1.063 | 3502.6 |
| $\Delta Le3590$ |   | 2762.4 | 1.022 | 2702.9 | $\Delta Le3696$ |   | 3546.3 | 1.174 | 3020.7 |
| $\Delta Le3816$ |  | 3796.5 | 1.39  | 2731.3 | $\Delta Le4011$ |  | 4302.2 | 1.443 | 2981.4 |

|                 |                                                                                     |        |       |        |                 |                                                                                       |        |       |        |
|-----------------|-------------------------------------------------------------------------------------|--------|-------|--------|-----------------|---------------------------------------------------------------------------------------|--------|-------|--------|
| $\Delta Le4034$ | 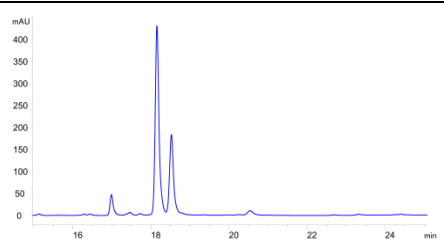   | 2957   | 1.03  | 2870.9 | $\Delta Le4042$ |    | 2103.3 | 1.218 | 1726.8 |
| $\Delta Le4189$ |    | 2285.2 | 1.205 | 1896.4 | $\Delta Le4215$ |    | 3125.1 | 1.234 | 2532.5 |
| $\Delta Le4260$ |   | 3987.5 | 1.049 | 3801.2 | $\Delta Le4303$ |   | 3359.8 | 1.223 | 2747.2 |
| $\Delta Le4778$ |  | 2411   | 1.152 | 2092.9 | $\Delta Le5176$ |  | 2854.1 | 1.266 | 2254.4 |

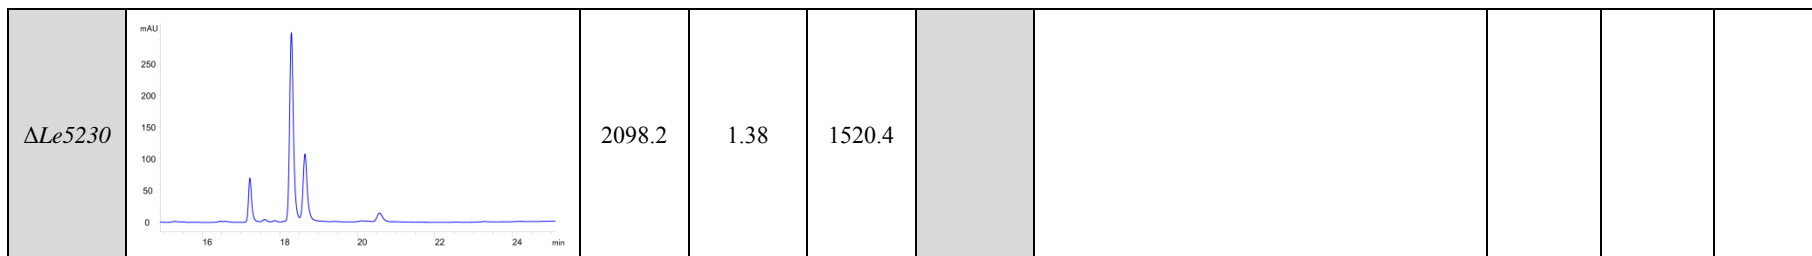

17 <sup>a</sup>The peak of HSAF produced by *Lysobacter enzymogenes* OH11 was indicated by a red arrow.

18

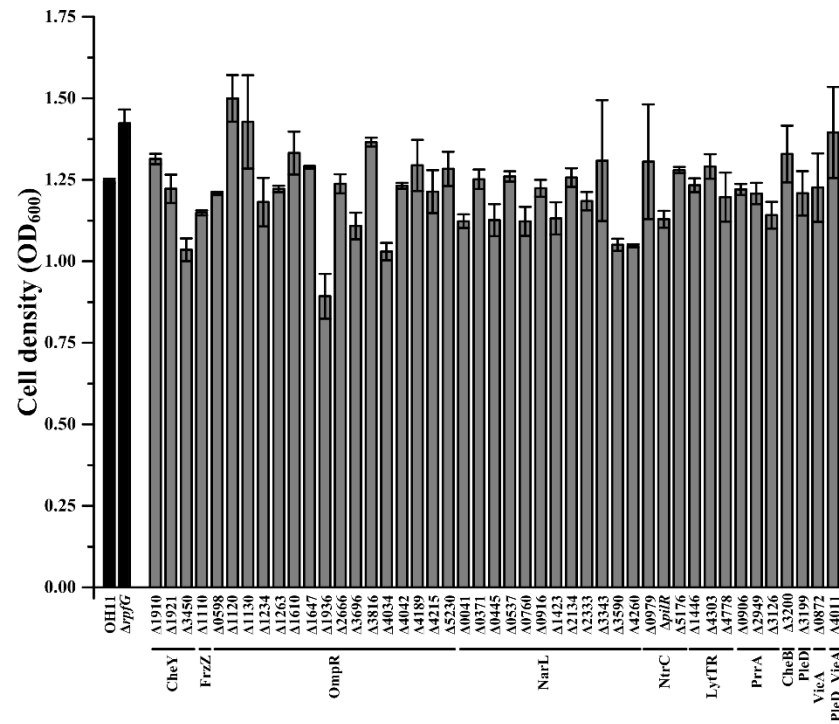

19

20 **Figure S1. *L. enzymogenes* RR deletion mutants do not have significant growth defects in the HSAF-inducing medium.** The same OD<sub>600</sub> of bacterial culture of each mutant was used as

21 original inoculum, and these inoculated cultures were grown at 28°C for 48 h, followed by measuring OD<sub>600</sub>.

22

23

24

25

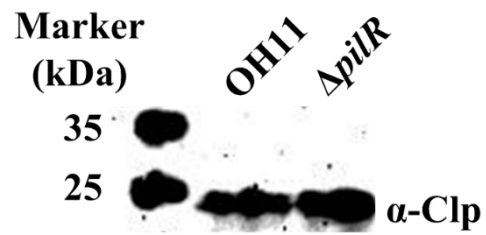

26

27 **Figure S2 Mutation of *pilR* did not significantly alter protein level of Clp in *Lysobacter enzymogenes*.** Cells were harvested at OD<sub>600</sub> of 1.0 that were grown in the HSAF-producing medium

28 (1/10 TSB). At this OD<sub>600</sub> value (1.0), *L. enzymogenes* has been shown to produce HSAF according to our earlier study (1). The 25-KD band corresponding to the predicated size of Clp was

29 detected by the polyclonal antibody  $\alpha$ -Clp.

30

31

32

33

34

35

36

37

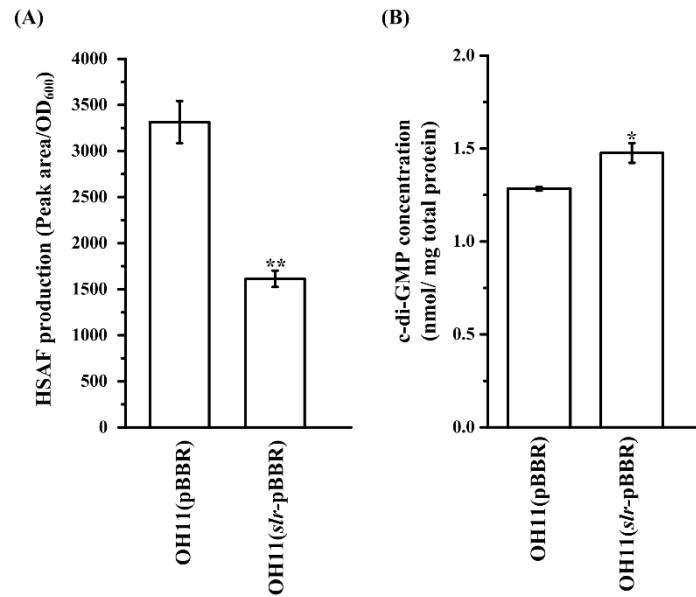

38

39 **Figure S3 Increased c-di-GMP levels suppressed HSAF production at wild type of *Lysobacter enzymogenes*.** (A) The c-di-GMP diguanylate cyclase, Slr1143, significantly reduces HSAF  
40 production (A), while remarkably increases c-di-GMP levels (B) at the wild-type OH11. OH11(pBBR) and OH11 (*slr*-pBBR) indicate the wild-type OH11 containing empty vector and the  
41 plasmid-borne *slr1143*, respectively. Three technical replicates for each treatment were used, and the biological experiment was performed three times. Vertical bars represent standard errors.

42 \*P<0.05 or \*\*P<0.01 relative to the wild-type OH11 containing empty vector.

43



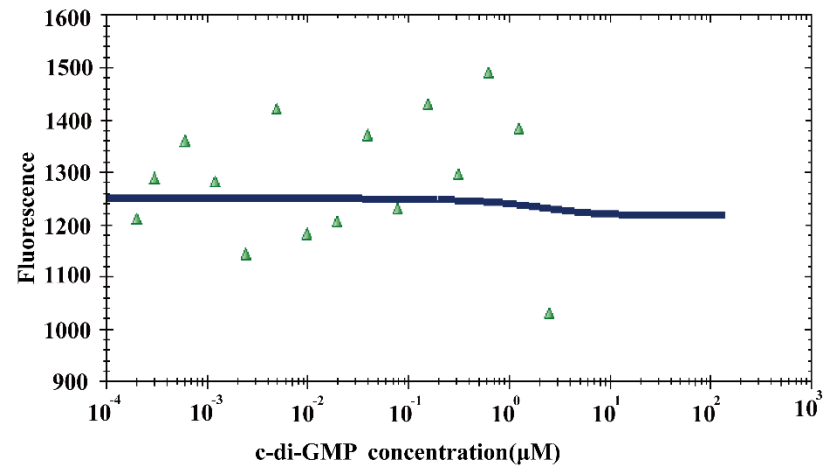

44

45 **Figure S4** The binding of c-di-GMP and PilR measured by Microscale Thermophoresis. No binding could be observed for c-di-GMP and the His-tagged PilR.

46

47 **Reference**

48 1. **Wang RP, Xu HY, Du LC, Chou SH, Liu HX, Liu YZ, Liu FQ and Qian GL.** 2016. A TonB-dependent receptor regulates antifungal HSAF biosynthesis in

49 *Lysobacter*. *Sci Rep* **6**:26881.

50
